# Supplementary material for: Enrichment and detection of bone disseminated tumor cells in models of low tumor burden
Source: PubMed Central journal article supplement (PMC6155169; doi:10.1038/s41598-018-32653-2), 2018-09-24
Supplement: 41598_2018_32653_MOESM1_ESM.pdf [file 41598_2018_32653_MOESM1_ESM.pdf]

Enrichment and detection of bone disseminated tumor cells in models of low tumor burden

Miranda E. Sowder<sup>1,2</sup> and Rachelle W. Johnson<sup>\*1,2,3</sup>

<sup>1</sup>Program in Cancer Biology, Vanderbilt University, Nashville, TN, 37232

<sup>2</sup>Vanderbilt Center for Bone Biology, Department of Medicine, Division of Clinical Pharmacology, Vanderbilt University Medical Center, Nashville, TN 37232

<sup>3</sup>Department of Medicine, Division of Clinical Pharmacology, Vanderbilt University Medical Center, Nashville, TN, 37232

\*Corresponding author:

Rachelle W. Johnson

2215b Garland Ave

1165C Medical Research Building IV

Vanderbilt University

Nashville, TN 37232

Email: [rachelle.johnson@vanderbilt.edu](mailto:rachelle.johnson@vanderbilt.edu)

Phone: 615-875-8965

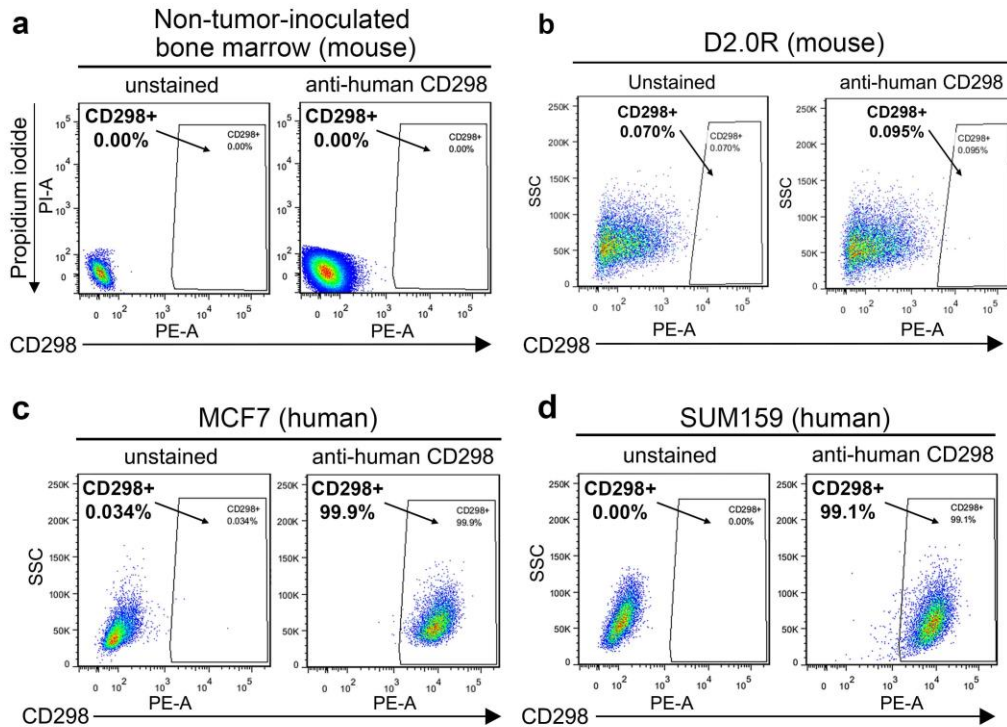

**Supplementary Figure 1. CD298 expression in non-tumor-bearing bone marrow and cells grown *in vitro*.** (a) Representative flow cytometry plot of CD298 staining in non-tumor-inoculated (naïve) mouse bone marrow (representative of n=3 mice). (b) Flow cytometry plot of CD298 staining in (b) mouse D2.0R, (c) human MCF7, and (d) human SUM159 cells grown *in vitro* (n=1 experiment).

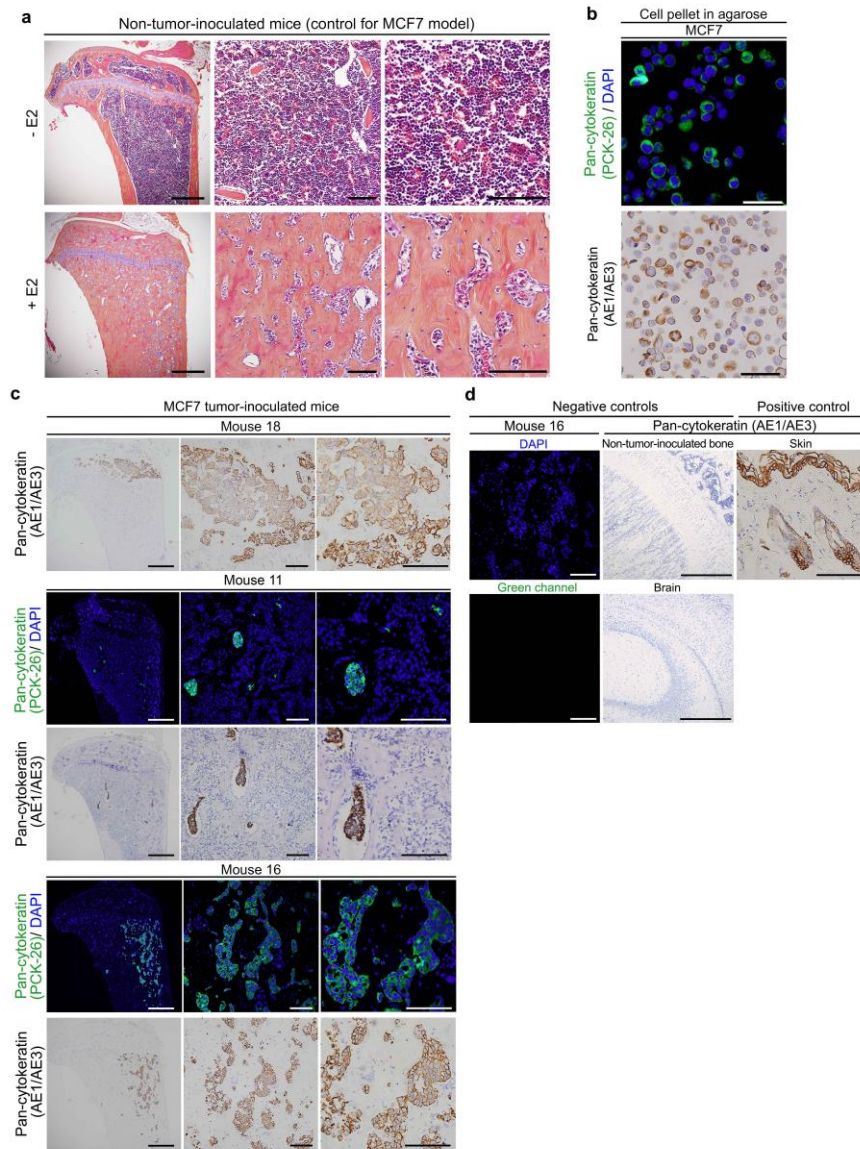

**Supplementary Figure 2. Immunostaining for pan-cytokeratin in tumor cells and bones of tumor-inoculated mice.** (a) Representative hematoxylin and eosin (H&E) images of tibiae from non-tumor-inoculated -E2 (n=10) and +E2 (n=8) mice. Panels left to right = 4X, 20X, 40X of same tibia. Scale bars = 500 $\mu$ m (left) and 100 $\mu$ m (right two panels). (b) Representative images of pan-cytokeratin staining (PCK-26 and AE1/AE3) in MCF7 cells grown *in vitro* and prepared as a cell pellet in agarose for sectioning and staining (n=1 experiment). Scale bars = 100 $\mu$ m. (c) Positive immunostaining for pan-cytokeratin (PCK-26 and AE1/AE3) in the tibiae of three different MCF7-inoculated mice. Panels left to right = 4X, 20X, 40X of same tibia. Scale bars = 500 $\mu$ m (left panel) and 100 $\mu$ m (right two panels). (d) Representative images of tibiae stained with DAPI alone showing no autofluorescence in the green channel and non-tumor-bearing (naïve) tibiae or brain stained with pan-cytokeratin (AE1/AE3) as negative controls. Skin stained with pan-cytokeratin (AE1/AE3) was used as a positive control. Scale bars = 100 $\mu$ m (left panels, top and bottom) and 500 $\mu$ m (right two panels, top and bottom).

**Supplementary Figure 3. Raw data for qPCR analysis of MCF7 model.** Raw Ct values and deltaCt analysis of technical and biological replicates for hydroxymethylbilane synthase (*Hmbs*), hypoxanthine phosphoribosyltransferase 1 (*HPRT1*), and beta-2-microglobulin (*B2M*).

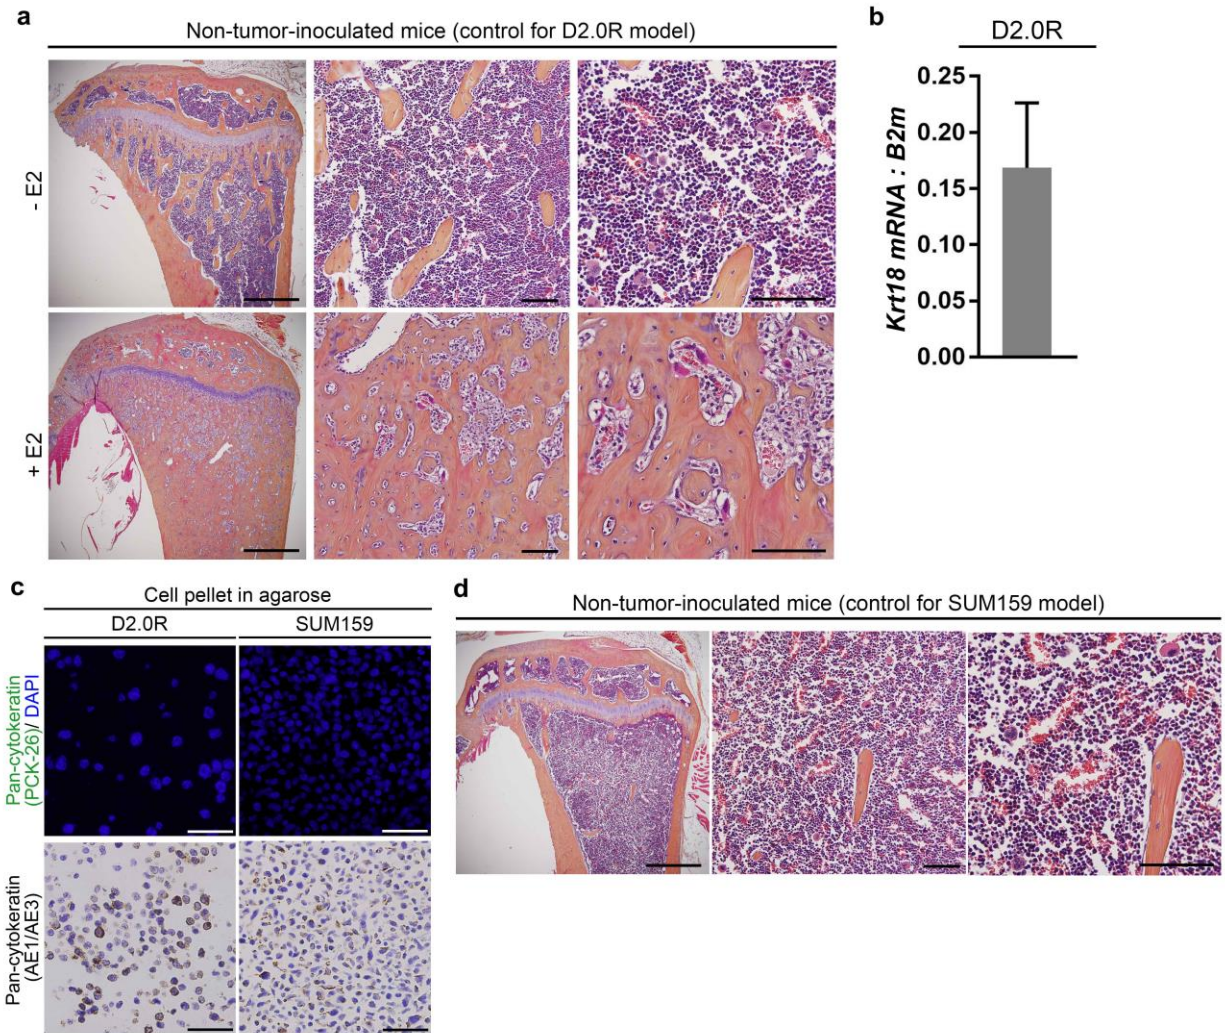

**Supplementary Figure 4. H&E images of non-tumor-inoculated mice for D2.0R and SUM159 models and immunostaining for pan-cytokeratin in D2.0R and SUM159 cells grown *in vitro*.** (a) Representative hematoxylin and eosin (H&E) images of tibiae from non-tumor-inoculated -E2 (n=10) and +E2 (n=8) mice as controls for the D2.0R model. Panels left to right = 4X, 20X, 40X of same tibia. Scale bars = 500µM (left) and 100µM (right two panels). (b) Expression of *Krt18* in D2.0R cells grown *in vitro* (n=3 replicates from 3 experiments). (c) Pan-cytokeratin (PCK-26 and AE1/AE3) staining of D2.0R and SUM159 cells grown *in vitro* and prepared as cell pellets in agarose for sectioning and staining. (d) Representative hematoxylin and eosin (H&E) images of tibiae from non-tumor-inoculated (n=10) mice as controls for the SUM159 model. Panels left to right = 4X, 20X, 40X of same tibia. Scale bars = 500µM (left) and 100µM (right two panels).

**Supplementary Figure 5. Raw data for qPCR analysis of D2.0R model.** Raw Ct values and deltaCt analysis of technical and biological replicates for hydroxymethylbilane synthase (*Hmbs*) and keratin 18 (*Krt18*).

**Supplementary Figure 6. Raw data for qPCR analysis of SUM159 model.** Raw Ct values and deltaCt analysis of technical and biological replicates for hydroxymethylbilane synthase (*Hmbs*), hypoxanthine phosphoribosyltransferase 1 (*HPRT1*), and beta-2-microglobulin (*B2M*).

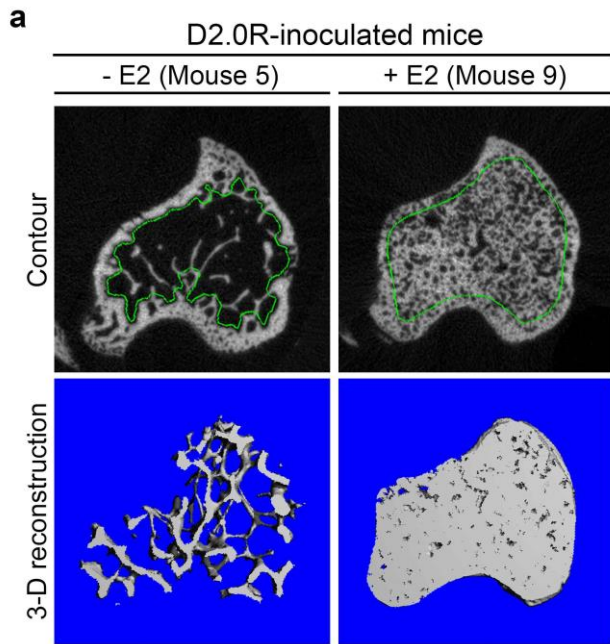

**Supplementary Figure 7. microCT contours and 3-D reconstruction for D2.0R model.** Representative images of drawn microCT contours (green line) and corresponding 3-D reconstruction for -E2 (n=8 mice) and +E2 (n=6 mice) D2.0R-inoculated mice.



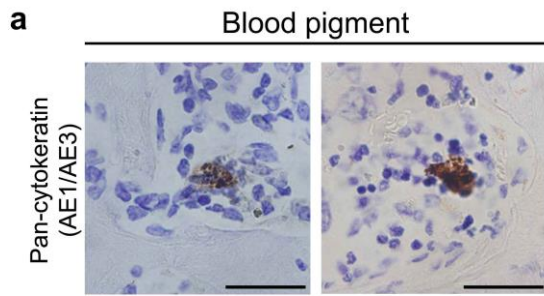

**Supplementary Figure 8. Non-specific staining for cytokeratin in the bone marrow.** Blood pigment present in pan-cytokeratin (AE1/AE3) stained tibiae. Scale bars = 25 $\mu$ M.
